# Supplementary material for: The association between carotenoids and subjects with overweight or obesity: a systematic review and meta-analysis
Source: Royal Society of Chemistry journal article supplement (doi:10.1039/d1fo00004g), 2021-01-01
Supplement: d1fo00004g1.pdf [file d1fo00004g1.pdf]

Table S1: The risk of bias within individual studies for RCTs

M. Abidov et al. 2009

|               |                                                                                                                                                                                                                                                                                                                                                                                                                                                                                                                                        |
|---------------|----------------------------------------------------------------------------------------------------------------------------------------------------------------------------------------------------------------------------------------------------------------------------------------------------------------------------------------------------------------------------------------------------------------------------------------------------------------------------------------------------------------------------------------|
| Methods       | RCT, (Carotenoids vs. placebo)<br>16 weeks<br>Summary risk of bias: low                                                                                                                                                                                                                                                                                                                                                                                                                                                                |
| Participants  | NLF group: People with obesity (BMI>30kg/m <sup>2</sup> )<br>N: 19 intervention, 19 control<br>Mean age in years (SE): 35.7(3.20) intervention, 34.7(3.50) control<br>Gender: 0 males/19females intervention, 0 males /19 females control<br>NAFLD group: People with obesity (BMI>30kg/m <sup>2</sup> )<br>N: 36 intervention, 36 control<br>Mean age in years (SE): 36.1(2.10) intervention, 37.4(2.80) control<br>Gender: 0 males/36females intervention, 0 males /36 females control<br>Location: Russia                           |
| Interventions | Type: Carotenoid supplement (Xanthigen, containing fucoxanthin)<br>Comparison: Xanthigen supplementation vs. control<br>Intervention: Participants in intervention group received Xanthigen, 2.4mg fucoxanthin one three times a day 15–30 min before meals.<br>Control: a placebo capsule was given one three times a day 15–30 min before meals.<br>Compliance: Participants were required to visit the hospital three times a week for anthropometrical, physiological and biochemical analyses<br>Length of intervention: 16 weeks |
| Outcomes      | Main study outcome: Body weight, body fat, waist circumference, liver fat, TG, AST, ALT, GGT, CRP, Systolic blood pressure and Diastolic blood pressure in the study groups at the beginning and the end of the study and intergroup comparison<br>Dropouts:0 intervention, 0 control<br>Available outcomes: Body weight, body fat, waist circumference, liver fat, TG, AST, ALT, GGT, CRP, Systolic blood pressure and Diastolic blood pressure in the study group at the beginning and the end of the study and control group.       |
| Notes         | The body weight, body fat, waist circumference, liver fat and TG of intervention group and control group, the beginning and the end of the intervention group were compared.                                                                                                                                                                                                                                                                                                                                                           |

**Risk of bias**

| Bias                                                      | Authors' judgment    | Support for judgment                                                   |
|-----------------------------------------------------------|----------------------|------------------------------------------------------------------------|
| Random sequence generation (selection bias)               | Low risk             | This was a double-blind, placebo-controlled, randomized clinical trial |
| Allocation concealment (selection bias)                   | Unclear risk of bias | The method of random assignment was not mentioned in the article       |
| Blinding of participants and personnel (performance bias) | Low risk             | double-blinded                                                         |

|                                                    |                      |                                                                                                                                           |
|----------------------------------------------------|----------------------|-------------------------------------------------------------------------------------------------------------------------------------------|
| All outcomes                                       |                      |                                                                                                                                           |
| Blinding of outcome assessment<br>(detection bias) | Unclear risk of bias | Not mentioned                                                                                                                             |
| All outcomes                                       |                      |                                                                                                                                           |
| Incomplete outcome data (attrition<br>bias)        | Low risk             | Participant flow well described.                                                                                                          |
| All outcomes                                       |                      |                                                                                                                                           |
| Selective reporting (reporting bias)               | Low risk             | The published report contains all the<br>expected results.                                                                                |
| Attention                                          | Low risk             | All participants appear to have had<br>similar frequency and quantity of<br>attention and follow-up.                                      |
| Compliance                                         | Low risk             | Participants were required to visit the<br>hospital three times a week for<br>anthropometrical, physiological and<br>biochemical analyses |
| Other bias                                         | Low risk             | No commercial company involved, and<br>no conflict of interest.                                                                           |

Table S1: The risk of bias within individual studies for RCTs (continued)

Ryo et al. 2018

|                            |                                                                                                                                                                                                                                                                                                                                                                                                                                                                                                                                                                                                                                                                                                                                                                                                                                                                                                                                |                                                                                                                                                                                                                                                               |
|----------------------------|--------------------------------------------------------------------------------------------------------------------------------------------------------------------------------------------------------------------------------------------------------------------------------------------------------------------------------------------------------------------------------------------------------------------------------------------------------------------------------------------------------------------------------------------------------------------------------------------------------------------------------------------------------------------------------------------------------------------------------------------------------------------------------------------------------------------------------------------------------------------------------------------------------------------------------|---------------------------------------------------------------------------------------------------------------------------------------------------------------------------------------------------------------------------------------------------------------|
| Methods                    | <p>RCT, (Carotenoids vs. placebo)</p> <p>12 weeks</p> <p>Summary risk of bias: low</p>                                                                                                                                                                                                                                                                                                                                                                                                                                                                                                                                                                                                                                                                                                                                                                                                                                         |                                                                                                                                                                                                                                                               |
| Participants               | <p>patients with overweight (BMI from 25 to &lt; 30 kg/m<sup>2</sup>) and aged &gt; 20 years</p> <p>N: 41 intervention, 39 control</p> <p>Mean age in years (SE): 48.90(1.38) intervention, 50.8(1.39) control</p> <p>Location: Japan</p>                                                                                                                                                                                                                                                                                                                                                                                                                                                                                                                                                                                                                                                                                      |                                                                                                                                                                                                                                                               |
| Interventions              | <p>Type: supplement (Paprika xanthophyll capsules)</p> <p>Comparison: Paprika xanthophyll capsules supplementation vs. control</p> <p>Intervention: supplemented with 9mg of carotenoids every night after meal for 12 weeks</p> <p>Control: supplemented with placebo every night after meal for 12 weeks</p> <p>Compliance: In week 0 (before starting administration) and week 12 of the treatment period, subjects underwent computed tomography (CT), interview by a site investigator, measurement of anthropometric, physical, blood, and urine parameters, and the confirmation of the dairy record. On the day before each set of tests, subjects were prohibited from drinking alcohol and performing excessive exercise, and had to finish the evening meal by 22:00. After that, only intake of water was allowed until the tests were completed on the following day.</p> <p>Length of intervention: 12 weeks</p> |                                                                                                                                                                                                                                                               |
| Outcomes                   | <p>Main study outcome: Anthropometric measurements, measurements of the abdominal fat area and biochemical parameters in the study group at the beginning and the end of the study and control group.</p> <p>Dropouts: 2 subjects dropped out for personal reasons unrelated to ingestion of the study capsules</p> <p>Available outcomes: all of the results were available and was expressed as actual values or as the changes from week 0 in the study group at the beginning and the end of the study and control group.</p>                                                                                                                                                                                                                                                                                                                                                                                              |                                                                                                                                                                                                                                                               |
| Notes                      | <p>The parameters of intervention group and control group, the beginning and the end of the intervention group were compared.</p>                                                                                                                                                                                                                                                                                                                                                                                                                                                                                                                                                                                                                                                                                                                                                                                              |                                                                                                                                                                                                                                                               |
| <b><i>Risk of bias</i></b> |                                                                                                                                                                                                                                                                                                                                                                                                                                                                                                                                                                                                                                                                                                                                                                                                                                                                                                                                |                                                                                                                                                                                                                                                               |
|                            | <b>Bias</b>                                                                                                                                                                                                                                                                                                                                                                                                                                                                                                                                                                                                                                                                                                                                                                                                                                                                                                                    | <b>Authors' judgment</b>                                                                                                                                                                                                                                      |
|                            | Random sequence generation<br>(selection bias)                                                                                                                                                                                                                                                                                                                                                                                                                                                                                                                                                                                                                                                                                                                                                                                                                                                                                 | Low risk                                                                                                                                                                                                                                                      |
|                            |                                                                                                                                                                                                                                                                                                                                                                                                                                                                                                                                                                                                                                                                                                                                                                                                                                                                                                                                | <p>randomized double-blind placebo-controlled clinical trial. The controller randomized the subjects to each group at a 1:1 ratio using a table of random numbers, and stored the assignment list in a sealed container until completion of all analyses.</p> |

|                                                                           |          |                                                                                                                                                                                                                                                                       |
|---------------------------------------------------------------------------|----------|-----------------------------------------------------------------------------------------------------------------------------------------------------------------------------------------------------------------------------------------------------------------------|
| Allocation concealment (selection bias)                                   | Low risk | stored the assignment list in a sealed container until completion of all analyses.                                                                                                                                                                                    |
| Blinding of participants and personnel (performance bias)<br>All outcomes | Low risk | double-blinded                                                                                                                                                                                                                                                        |
| Blinding of outcome assessment (detection bias)<br>All outcomes           | Low risk | Apart from the controller, all of the investigators and data processors, as well as all of the subjects, were blinded to the treatment assigned until the end of this trial                                                                                           |
| Incomplete outcome data (attrition bias)<br>All outcomes                  | Low risk | Participant flow well described.                                                                                                                                                                                                                                      |
| Selective reporting (reporting bias)                                      | Low risk | registration of clinical trials:<br>UMIN000021529                                                                                                                                                                                                                     |
| Attention                                                                 | Low risk | All participants appear to have had similar frequency and quantity of attention and follow-up.                                                                                                                                                                        |
| Compliance                                                                | Low risk | On the day before each set of tests, subjects were prohibited from drinking alcohol and performing excessive exercise, and had to finish the evening meal by 22:00. After that, only intake of water was allowed until the tests were completed on the following day. |
| Other bias                                                                | Low risk | The authors are employees of Ezaki Glico Co., Ltd., but this did not influence the author's adherence to the journal's policy.                                                                                                                                        |

Table S1: The risk of bias within individual studies for RCTs (continued)

Zohre et al. 2014

|               |                                                                                                                                                                                                                                                                                                                                                                                                                                                                                                                                                                                                                                                                                                                                      |
|---------------|--------------------------------------------------------------------------------------------------------------------------------------------------------------------------------------------------------------------------------------------------------------------------------------------------------------------------------------------------------------------------------------------------------------------------------------------------------------------------------------------------------------------------------------------------------------------------------------------------------------------------------------------------------------------------------------------------------------------------------------|
| Methods       | RCT, (Carotenoids vs. placebo)<br>20 days<br>Summary risk of bias: Unclear                                                                                                                                                                                                                                                                                                                                                                                                                                                                                                                                                                                                                                                           |
| Participants  | All patients with BMI of 25 kg/m <sup>2</sup> or higher.<br>N: 40 intervention vs 35 controls<br>age: all patients in this study were aged between 20 and 30 years.<br>Gender: 0 males/40 females intervention group, 0 males /35 females placebo group.<br>Location: Iran                                                                                                                                                                                                                                                                                                                                                                                                                                                           |
| Interventions | Comparison: Carotenoids (tomato juice) vs. placebo(water)<br>Intervention: The intervention group received 330 ml (two cups) of tomato juice (Takdaneh Company), and the control group (n = 40) received two cups of water daily for 20 days, respectively. This amount of tomato juice provided 60 mg of lycopene. Participants were asked to consume the juice two times a day (morning and afternoon)<br>Compliance: The strategy for monitoring adherence to the protocol was by using phone calls to participants every 3 days. To minimize loss of juice due to other family members consuming and/or spilling the study tomato juice, three additional packets were given to participants.<br>Length of intervention: 20 days |
| Outcomes      | Main study outcome: Antioxidant and anthropometric indicators of intervention and control groups pre- and postintervention<br>Dropouts: 5 drop out due to unwillingness to continue with sample collection procedures.<br>Available outcomes: Weight and BMI at the beginning and the end of the intervention group.                                                                                                                                                                                                                                                                                                                                                                                                                 |
| Notes         | Weight and BMI at the beginning and the end of the intervention group were compared.                                                                                                                                                                                                                                                                                                                                                                                                                                                                                                                                                                                                                                                 |

***Risk of bias***

| Bias                                        | Authors' judgment | Support for judgment                                                                                                                                                                                                  |
|---------------------------------------------|-------------------|-----------------------------------------------------------------------------------------------------------------------------------------------------------------------------------------------------------------------|
| Random sequence generation (selection bias) | Low risk          | Subjects were randomly allocated to the intervention or control group using a computer-generated program by an independent statistician                                                                               |
| Allocation concealment (selection bias)     | Low risk          | Initial diet allocation was concealed from the clinical recruitment staff until each woman had entered the trial and received a randomization code. This clinical trial was carried out as a double blinded procedure |

|                                                                           |              |                                                                                                                                                                                                                                                                          |
|---------------------------------------------------------------------------|--------------|--------------------------------------------------------------------------------------------------------------------------------------------------------------------------------------------------------------------------------------------------------------------------|
| Blinding of participants and personnel (performance bias)<br>All outcomes | High risk    | Obviously not used                                                                                                                                                                                                                                                       |
| Blinding of outcome assessment (detection bias)<br>All outcomes           | Unclear risk | Not mentioned                                                                                                                                                                                                                                                            |
| Incomplete outcome data (attrition bias)<br>All outcomes                  | Low risk     | Participant flow well described                                                                                                                                                                                                                                          |
| Selective reporting (reporting bias)<br>Attention                         | Unclear risk | The clinical registration number was lacked.                                                                                                                                                                                                                             |
| Compliance                                                                | Low risk     | No problem with attention bias.                                                                                                                                                                                                                                          |
| Other bias                                                                | Low risk     | The strategy for monitoring adherence to the protocol was by using phone calls to participants every 3 days. To minimize loss of juice due to other family members consuming and/or spilling the study tomato juice, three additional packets were given to participants |
|                                                                           |              | No commercial company involved, and no conflict of interest.                                                                                                                                                                                                             |

Table S1: The risk of bias within individual studies for RCTs (continued)

María et al. 2019

|               |                                                                                                                                                                                                                                                                                                                                                                                                                                                                                                                                                                                                                                                                              |
|---------------|------------------------------------------------------------------------------------------------------------------------------------------------------------------------------------------------------------------------------------------------------------------------------------------------------------------------------------------------------------------------------------------------------------------------------------------------------------------------------------------------------------------------------------------------------------------------------------------------------------------------------------------------------------------------------|
| Methods       | RCT, (Carotenoids vs. placebo)<br>4 weeks<br>Summary risk of bias: low                                                                                                                                                                                                                                                                                                                                                                                                                                                                                                                                                                                                       |
| Participants  | volunteers with moderate obesity, $30 < \text{BMI} < 35 \text{ kg/m}^2$<br>Mean age in years (SD): 56.2(5.9) intervention group, 56.1(5.8) control group.<br>N: 6 intervention, 6 control<br>Gender: 2 males/4 females intervention, 4 males /2 females control<br>Location: Denmark                                                                                                                                                                                                                                                                                                                                                                                         |
| Interventions | Type: supplement (capsule of 7mg GA lycopene formulated with medium saturated fatty acids, GAL-MSFA)<br>Comparison: Carotenoids vs. placebo<br>Intervention: lycopene formulated with GAL-MSFA (7mg GA lycopene/d, capsules were advised to be taken once a day after the main meal.)<br>Control: GAL-MSFA (capsules were advised to be taken once a day after the main meal)<br>Compliance: Both capsule and chocolate products were advised to be taken once a day after the main meal. All patients were informed of the purpose and goals of the study and had signed a consent form before enrolment and participation in the study.<br>Length of intervention: 4 weeks |
| Outcomes      | Main study outcome: blood and tissue parameters, such LDL and HDL, of intervention and control groups pre- and postintervention<br>Dropouts: 0<br>Available outcomes: TG, LDL and HDL in the intervention group at the beginning and the end of the study and control group.                                                                                                                                                                                                                                                                                                                                                                                                 |
| Notes         | TG, LDL and HDL of intervention group and control group, the beginning and the end of the intervention group were compared.                                                                                                                                                                                                                                                                                                                                                                                                                                                                                                                                                  |

***Risk of bias***

| Bias                                                                      | Authors' judgment | Support for judgment      |
|---------------------------------------------------------------------------|-------------------|---------------------------|
| Random sequence generation<br>(selection bias)                            | Low risk          | randomized clinical trial |
| Allocation concealment (selection bias)                                   | Unclear risk      | Not mentioned             |
| Blinding of participants and personnel (performance bias)<br>All outcomes | Low risk          | double-blinded            |
| Blinding of outcome assessment<br>(detection bias)<br>All outcomes        | Unclear risk      | Not mentioned             |

|                                                          |          |                                                                                                                                                                                                                                              |
|----------------------------------------------------------|----------|----------------------------------------------------------------------------------------------------------------------------------------------------------------------------------------------------------------------------------------------|
| Incomplete outcome data (attrition bias)<br>All outcomes | Low risk | There was no dropout.                                                                                                                                                                                                                        |
| Selective reporting (reporting bias)                     | Low risk | registration of clinical trials:<br>ACTRN12618000715279.                                                                                                                                                                                     |
| Attention                                                | Low risk | No problem with attention bias.                                                                                                                                                                                                              |
| Compliance                                               | Low risk | Both capsule and chocolate products were advised to be taken once a day after the main meal. All patients were informed of the purpose and goals of the study and had signed a consent form before enrolment and participation in the study. |
| Other bias                                               | Low risk | No commercial company involved, and no conflict of interest.                                                                                                                                                                                 |



Table S1: The risk of bias within individual studies for RCTs (continued)

Hye et al. 2011

|                            |                                                                                                                                                                                                                                                                                                                                                                                                                                                                                                                                                                                                                                                                                                                                                                                                                                                                                                              |                                                                                                               |
|----------------------------|--------------------------------------------------------------------------------------------------------------------------------------------------------------------------------------------------------------------------------------------------------------------------------------------------------------------------------------------------------------------------------------------------------------------------------------------------------------------------------------------------------------------------------------------------------------------------------------------------------------------------------------------------------------------------------------------------------------------------------------------------------------------------------------------------------------------------------------------------------------------------------------------------------------|---------------------------------------------------------------------------------------------------------------|
| Methods                    | RCT, (Carotenoids vs. placebo)<br>12 weeks<br>Summary risk of bias: low                                                                                                                                                                                                                                                                                                                                                                                                                                                                                                                                                                                                                                                                                                                                                                                                                                      |                                                                                                               |
| Participants               | All patients were overweight (body mass index (BMI) >25.0 kg/m <sup>2</sup> )<br>N: 14 intervention vs 13 control<br>Mean age in years (SD): 30.1(9.5) intervention group, 31.1(9.4) control group.<br>Gender: 12 males/2females intervention group, 11 males /2 females control group<br>Location: South Korea                                                                                                                                                                                                                                                                                                                                                                                                                                                                                                                                                                                              |                                                                                                               |
| Interventions              | Type: supplement (capsule of astaxanthin)<br>Comparison: Carotenoids vs. placebo<br>Intervention: The subjects in the astaxanthin group were instructed to take one 20 mg astaxanthin capsule (Marine. Product Tech. Inc., Seongnam, South Korea) once daily after breakfast for 12 weeks.<br>Compliance: All subjects visited for blood sampling every four weeks and body weight, height, and waist circumference were measured at baseline and at 12 weeks. During the study, the subjects were asked to maintain their usual lifestyle and to refrain from taking any vitamins or nutritional supplements. At the end of the study, all subjects were asked to bring back their remaining astaxanthin or placebo capsules and administration reports to assess adherence and adverse drug reactions<br>All subjects in the two intervention groups completed the study. Length of intervention: 12 weeks |                                                                                                               |
| Outcomes                   | Main study outcome: Blood Lipid Profiles, oxidative Stress Biomarkers in intervention and control groups pre- and postintervention intervention.<br>Dropouts: 0<br>Available outcomes: The indicators of body weight, BMI, waist circumference, TC, HDL and LDL at the beginning and the end of the intervention group.                                                                                                                                                                                                                                                                                                                                                                                                                                                                                                                                                                                      |                                                                                                               |
| Notes                      | The body weight, BMI, waist circumference, TC, HDL and LDL at the beginning and the end of the intervention group were compared.                                                                                                                                                                                                                                                                                                                                                                                                                                                                                                                                                                                                                                                                                                                                                                             |                                                                                                               |
| <b><i>Risk of bias</i></b> |                                                                                                                                                                                                                                                                                                                                                                                                                                                                                                                                                                                                                                                                                                                                                                                                                                                                                                              |                                                                                                               |
|                            | <b>Bias</b>                                                                                                                                                                                                                                                                                                                                                                                                                                                                                                                                                                                                                                                                                                                                                                                                                                                                                                  | <b>Authors' judgment</b>                                                                                      |
|                            | Random sequence generation (selection bias)                                                                                                                                                                                                                                                                                                                                                                                                                                                                                                                                                                                                                                                                                                                                                                                                                                                                  | Low risk                                                                                                      |
|                            | Allocation concealment (selection bias)                                                                                                                                                                                                                                                                                                                                                                                                                                                                                                                                                                                                                                                                                                                                                                                                                                                                      | Unclear risk                                                                                                  |
|                            | Blinding of participants and personnel (performance bias)<br>All outcomes                                                                                                                                                                                                                                                                                                                                                                                                                                                                                                                                                                                                                                                                                                                                                                                                                                    | Low risk                                                                                                      |
|                            |                                                                                                                                                                                                                                                                                                                                                                                                                                                                                                                                                                                                                                                                                                                                                                                                                                                                                                              | Support for judgment<br>randomized, double-blind, placebo-controlled trial<br>Not described<br>double-blinded |

|                                                                    |                          |                                                                                                                                                                                                                                                                                                                                                                                                                                                                                                                                   |
|--------------------------------------------------------------------|--------------------------|-----------------------------------------------------------------------------------------------------------------------------------------------------------------------------------------------------------------------------------------------------------------------------------------------------------------------------------------------------------------------------------------------------------------------------------------------------------------------------------------------------------------------------------|
| Blinding of outcome assessment<br>(detection bias)<br>All outcomes | Unclear risk             | Not described                                                                                                                                                                                                                                                                                                                                                                                                                                                                                                                     |
| Incomplete outcome data (attrition<br>bias)<br>All outcomes        | Low risk                 | There was no dropout.                                                                                                                                                                                                                                                                                                                                                                                                                                                                                                             |
| Selective reporting (reporting bias)<br>Attention                  | Unclear risk<br>Low risk | The clinical registration number was<br>lacked.<br>No problem with attention bias.                                                                                                                                                                                                                                                                                                                                                                                                                                                |
| Compliance                                                         | Low risk                 | All subjects visited for blood sampling<br>every four weeks and body weight,<br>height, and waist circumference were<br>measured at baseline and at 12 weeks.<br>During the study, the subjects were<br>asked to maintain their usual lifestyle<br>and to refrain from taking any vitamins<br>or nutritional supplements. At the end<br>of the study, all subjects were asked to<br>bring back their remaining astaxanthin<br>or placebo capsules and administration<br>reports to assess adherence and adverse<br>drug reactions |
| Other bias                                                         | Low risk                 | No commercial company involved, and<br>no conflict of interest.                                                                                                                                                                                                                                                                                                                                                                                                                                                                   |

Table S1: The risk of bias within individual studies for RCTs (continued)

Fatemeh et al. 2019

|                            |                                                                                                                                                                                                                                                                                                                                                                                                                                                                                                                                                                                                                                                                         |                                                                                                                                                                                                                                                                                                                                                                                                |
|----------------------------|-------------------------------------------------------------------------------------------------------------------------------------------------------------------------------------------------------------------------------------------------------------------------------------------------------------------------------------------------------------------------------------------------------------------------------------------------------------------------------------------------------------------------------------------------------------------------------------------------------------------------------------------------------------------------|------------------------------------------------------------------------------------------------------------------------------------------------------------------------------------------------------------------------------------------------------------------------------------------------------------------------------------------------------------------------------------------------|
| Methods                    | RCT, (Carotenoids vs. placebo)<br>12 weeks<br>Summary risk of bias: low                                                                                                                                                                                                                                                                                                                                                                                                                                                                                                                                                                                                 |                                                                                                                                                                                                                                                                                                                                                                                                |
| Participants               | Patients were overweight or obese with $25 \leq \text{BMI} < 40$ kg aged 25–70 years.<br>N: 23 intervention, 23 control<br>Mean age in years (SD): 38.1(7.6) intervention, 35.6(9.1) control<br>Location: Iran                                                                                                                                                                                                                                                                                                                                                                                                                                                          |                                                                                                                                                                                                                                                                                                                                                                                                |
| Interventions              | Type: supplement (BCX powder)<br>Comparison: carotenoids vs. control<br>Intervention: supplemented with 6 mg of BCX every day for 12 weeks<br>Control: supplemented with placebo every day for 12 weeks<br>Compliance: Apart from scheduled follow-up visits at weeks 6 and 12 of the intervention period, weekly phone follow-ups were carried out to minimize the attrition rate. Compliance, defined as taking $\geq 90\%$ of the prescribed capsules, was evaluated at every scheduled follow-up visit. To assess the blinding of the study, each subject was asked to guess his/her allocated intervention at study end point.<br>Length of intervention: 12 weeks |                                                                                                                                                                                                                                                                                                                                                                                                |
| Outcomes                   | Main study outcome: Subjects' anthropometrics, dietary intakes, physical activity, and serum BCX at baseline and study end point.<br>Dropouts: 0<br>Available outcomes: Body weight, BMI and WC at the beginning and the end of the study in the intervention group and control group.                                                                                                                                                                                                                                                                                                                                                                                  |                                                                                                                                                                                                                                                                                                                                                                                                |
| Notes                      | Data of body weight, BMI and WC intervention group and control group, the beginning and the end of the intervention group were compared.                                                                                                                                                                                                                                                                                                                                                                                                                                                                                                                                |                                                                                                                                                                                                                                                                                                                                                                                                |
| <b><i>Risk of bias</i></b> |                                                                                                                                                                                                                                                                                                                                                                                                                                                                                                                                                                                                                                                                         |                                                                                                                                                                                                                                                                                                                                                                                                |
|                            | <b>Bias</b>                                                                                                                                                                                                                                                                                                                                                                                                                                                                                                                                                                                                                                                             | <b>Authors' judgment</b>                                                                                                                                                                                                                                                                                                                                                                       |
|                            | Random sequence generation (selection bias)                                                                                                                                                                                                                                                                                                                                                                                                                                                                                                                                                                                                                             | Low risk                                                                                                                                                                                                                                                                                                                                                                                       |
|                            | Allocation concealment (selection bias)                                                                                                                                                                                                                                                                                                                                                                                                                                                                                                                                                                                                                                 | Low risk                                                                                                                                                                                                                                                                                                                                                                                       |
|                            | Blinding of participants and personnel (performance bias)<br>All outcomes                                                                                                                                                                                                                                                                                                                                                                                                                                                                                                                                                                                               | Low risk                                                                                                                                                                                                                                                                                                                                                                                       |
|                            |                                                                                                                                                                                                                                                                                                                                                                                                                                                                                                                                                                                                                                                                         | randomized double-blind placebo-controlled clinical trial by software<br><br>An experienced independent biostatistician generated the random allocation sequence at the AJUMS School of Health and gave it in sequentially numbered, opaque, and sealed envelopes to a trained clinician responsible for evaluation and enrollment of subjects at the Golestan Hospital.<br><br>double-blinded |

|                                                                    |          |                                                                                                                                                                                                                                                                                                                                                                                                              |
|--------------------------------------------------------------------|----------|--------------------------------------------------------------------------------------------------------------------------------------------------------------------------------------------------------------------------------------------------------------------------------------------------------------------------------------------------------------------------------------------------------------|
| Blinding of outcome assessment<br>(detection bias)<br>All outcomes | Low risk | The random allocation sequence was concealed, and subjects, health care providers, data collectors, and outcome adjudicators were blinded to the allocated interventions until the last recruited subject attended the final follow-up visit                                                                                                                                                                 |
| Incomplete outcome data (attrition bias)<br>All outcomes           | Low risk | Participant flow well described.                                                                                                                                                                                                                                                                                                                                                                             |
| Selective reporting (reporting bias)                               | Low risk | registration of clinical trials:<br>IRCT2017060210181N10                                                                                                                                                                                                                                                                                                                                                     |
| Attention                                                          | Low risk | All participants appear to have had similar frequency and quantity of attention and follow-up.                                                                                                                                                                                                                                                                                                               |
| Compliance                                                         | Low risk | Apart from scheduled follow-up visits at weeks 6 and 12 of the intervention period, weekly phone follow-ups were carried out to minimize the attrition rate. Compliance, defined as taking $\geq 90\%$ of the prescribed capsules, was evaluated at every scheduled follow-up visit. To assess the blinding of the study, each subject was asked to guess his/her allocated intervention at study end point. |
| Other bias                                                         | Low risk | No commercial company involved, and no conflict of interest.                                                                                                                                                                                                                                                                                                                                                 |

Table S1: The risk of bias within individual studies for RCTs (continued)

Akira et al. 2017

|                            |                                                                                                                                                                                                                                                                                                                                                                                                                                                                                                                                                                                                                                                                                                                                                                                                                                                                                                                                                                                                                                                       |
|----------------------------|-------------------------------------------------------------------------------------------------------------------------------------------------------------------------------------------------------------------------------------------------------------------------------------------------------------------------------------------------------------------------------------------------------------------------------------------------------------------------------------------------------------------------------------------------------------------------------------------------------------------------------------------------------------------------------------------------------------------------------------------------------------------------------------------------------------------------------------------------------------------------------------------------------------------------------------------------------------------------------------------------------------------------------------------------------|
| Methods                    | RCT, (Carotenoids vs. placebo)<br>12 weeks<br>Summary risk of bias: low                                                                                                                                                                                                                                                                                                                                                                                                                                                                                                                                                                                                                                                                                                                                                                                                                                                                                                                                                                               |
| Participants               | Trial 1<br>patients with BMI ranging from 25 to 32 kg/m <sup>2</sup><br>N: 13 intervention, 10 control<br>Mean age in years (SD): 41(9.0) intervention, 44 (9.0) control<br>Location: Japan<br>Trial 2<br>patients with BMI ranging from 25 to 30 kg/m <sup>2</sup><br>N: 46 intervention, 45 control<br>Mean age in years (SD): 43(10) intervention, 44 (11) control<br>Location: Japan                                                                                                                                                                                                                                                                                                                                                                                                                                                                                                                                                                                                                                                              |
| Interventions              | Trial 1<br>Type: supplement (β-CX beverage)<br>Comparison: vitamin D supplementation vs. control<br>Intervention: supplemented with 1.2mg β-CX per day after a meal for 12 weeks.<br>Control: supplemented with placebo per day after a meal for 12 weeks.<br>Compliance: Physical and clinical parameters were evaluated at the beginning of the pre-treatment period(baseline), the beginning of the treatment period (Week 0), and the last day of the treatment period (Week 12).<br>Length of intervention: 12 weeks<br>Trial 2<br>Type: supplement (β-CX beverage)<br>Comparison: vitamin D supplementation vs. control<br>Intervention: supplemented with 2mg β-CX per day (at any time) for 12 weeks.<br>Control: supplemented with placebo per day (at any time) for 12 weeks.<br>Compliance: Subjects underwent evaluation of physical and clinical parameters every 4 weeks during the treatment period (Week 0, Week 4, Week 8, and Week 12; Week 0 represents the beginning of the treatment period)<br>Length of intervention: 12 weeks |
| Outcomes                   | Main study outcome: Physical parameters at the beginning and the end of the study in the intervention group and control group.<br>Dropouts: one subject dropped out of the trial for personal reasons in trial 2.<br>Available outcomes: BMI and weight in the intervention group at the beginning and the end of the study and control group.                                                                                                                                                                                                                                                                                                                                                                                                                                                                                                                                                                                                                                                                                                        |
| Notes                      | The BMI and weight of intervention group and control group, the beginning and the end of the intervention group were compared.                                                                                                                                                                                                                                                                                                                                                                                                                                                                                                                                                                                                                                                                                                                                                                                                                                                                                                                        |
| <b><i>Risk of bias</i></b> |                                                                                                                                                                                                                                                                                                                                                                                                                                                                                                                                                                                                                                                                                                                                                                                                                                                                                                                                                                                                                                                       |

| <b>Bias</b>                                                               | <b>Authors' judgment</b> | <b>Support for judgment</b>                                                                                                                                                                                                                                                                                                                                                                                                                 |
|---------------------------------------------------------------------------|--------------------------|---------------------------------------------------------------------------------------------------------------------------------------------------------------------------------------------------------------------------------------------------------------------------------------------------------------------------------------------------------------------------------------------------------------------------------------------|
| Random sequence generation<br>(selection bias)                            | Low risk                 | randomized double-blind placebo-controlled clinical trial                                                                                                                                                                                                                                                                                                                                                                                   |
| Allocation concealment (selection bias)                                   | Unclear risk             | Not described.                                                                                                                                                                                                                                                                                                                                                                                                                              |
| Blinding of participants and personnel (performance bias)<br>All outcomes | Low risk                 | double-blinded                                                                                                                                                                                                                                                                                                                                                                                                                              |
| Blinding of outcome assessment<br>(detection bias)<br>All outcomes        | Unclear risk             | Not described.                                                                                                                                                                                                                                                                                                                                                                                                                              |
| Incomplete outcome data (attrition bias)<br>All outcomes                  | Low risk                 | Participant flow well described.                                                                                                                                                                                                                                                                                                                                                                                                            |
| Selective reporting (reporting bias)                                      | Low risk                 | registration of clinical trials: H21-079                                                                                                                                                                                                                                                                                                                                                                                                    |
| Attention                                                                 | Low risk                 | All participants appear to have had similar frequency and quantity of attention and follow-up.                                                                                                                                                                                                                                                                                                                                              |
| Compliance                                                                | Low risk                 | Trial 1: Physical and clinical parameters were evaluated at the beginning of the pre-treatment period(baseline), the beginning of the treatment period (Week 0), and the last day of the treatment period (Week 12).<br>Trial 2: Subjects underwent evaluation of physical and clinical parameters every 4 weeks during the treatment period (Week 0, Week 4, Week 8, and Week 12; Week 0 represents the beginning of the treatment period) |
| Other bias                                                                | Low risk                 | No commercial company involved, and no conflict of interest.                                                                                                                                                                                                                                                                                                                                                                                |

Table S2: The risk of bias within individual studies for observational studies by the NOS.

Rebecca et al. 2019

|                            |                                                                                                                                                                                                                                                               |                                                              |
|----------------------------|---------------------------------------------------------------------------------------------------------------------------------------------------------------------------------------------------------------------------------------------------------------|--------------------------------------------------------------|
| Study type                 | Cross-sectional study                                                                                                                                                                                                                                         |                                                              |
| Participants               | Patients: adolescents<br>Male group<br>N: 40 cases, 49 controls<br>Gender: 40 males/ 0females case, 49 males/0females control<br>Female group<br>N:44 cases, 105 controls<br>Gender: 0 males/ 44females case, 0 males/ 105females control<br>Location: Brazil |                                                              |
| Comparison                 | Comparison: patients with obese or overweight vs. control<br>Case: Patients with obese or overweight<br>Control: normal patients                                                                                                                              |                                                              |
| Outcomes                   | Main study outcome: the risk of $\beta$ -carotene insufficiency<br>Available outcomes: the risk of $\beta$ -carotene insufficiency                                                                                                                            |                                                              |
| <b><i>Risk of bias</i></b> |                                                                                                                                                                                                                                                               |                                                              |
|                            | <b>Bias</b>                                                                                                                                                                                                                                                   | <b>Authors' judgment</b>                                     |
|                            |                                                                                                                                                                                                                                                               | <b>Support for judgment</b>                                  |
|                            | Is the case definition adequate( <b>Selection</b> )                                                                                                                                                                                                           | 1<br>yes, with independent validation                        |
|                            | Representativeness of the cases( <b>Selection</b> )                                                                                                                                                                                                           | 1<br>consecutive or obviously representative series of cases |
|                            | Selection of Controls( <b>Selection</b> )                                                                                                                                                                                                                     | 1<br>community controls                                      |
|                            | Definition of Controls( <b>Selection</b> )                                                                                                                                                                                                                    | 1<br>no history of disease (endpoint)                        |
|                            | Comparability of cases and controls on the basis of the design or analysis( <b>Comparability</b> )                                                                                                                                                            | 1<br>study only controls age between case and control.       |
|                            | Ascertainment of exposure( <b>Exposure</b> )                                                                                                                                                                                                                  | 1<br>secure record                                           |
|                            | Same method of ascertainment for cases and controls( <b>Exposure</b> )                                                                                                                                                                                        | 1<br>yes                                                     |
|                            | Non-Response rate( <b>Exposure</b> )                                                                                                                                                                                                                          | 0<br>not described                                           |

Table S2: The risk of bias within individual studies for observational studies by the NOS (continued)

**Inong R. et al. 2014**

|                            |                                                                                                                                                                                                                                                                                                                                                                                    |                                                              |
|----------------------------|------------------------------------------------------------------------------------------------------------------------------------------------------------------------------------------------------------------------------------------------------------------------------------------------------------------------------------------------------------------------------------|--------------------------------------------------------------|
| Study type                 | Cross-sectional study                                                                                                                                                                                                                                                                                                                                                              |                                                              |
| Participants               | Patients: Mexica-American children aged 8-15 years<br>N:413 cases, 587 controls<br>Gender: 237 males/230 females case, 283 males /364 females control<br>Location: the U.S.                                                                                                                                                                                                        |                                                              |
| Comparison                 | Comparison: patients with obese or overweight vs. control<br>Case: children with obese or overweight<br>Control: children with normal weight.                                                                                                                                                                                                                                      |                                                              |
| Outcomes                   | Main study outcome: the risk for the excess body weight patients in trans- $\beta$ -carotene, cis- $\beta$ -carotene, $\alpha$ - carotene sufficiency, the correlation between the obesity and serum Carotenoids levels.<br>Available outcomes: the risk for the excess body weight patients in trans- $\beta$ -carotene, cis- $\beta$ -carotene, $\alpha$ - carotene sufficiency. |                                                              |
| <b><i>Risk of bias</i></b> |                                                                                                                                                                                                                                                                                                                                                                                    |                                                              |
|                            | <b>Bias</b>                                                                                                                                                                                                                                                                                                                                                                        | <b>Authors' judgment</b>                                     |
|                            | Is the case definition adequate( <b>Selection</b> )                                                                                                                                                                                                                                                                                                                                | 1<br>yes, with independent validation                        |
|                            | Representativeness of the cases( <b>Selection</b> )                                                                                                                                                                                                                                                                                                                                | 1<br>consecutive or obviously representative series of cases |
|                            | Selection of Controls( <b>Selection</b> )                                                                                                                                                                                                                                                                                                                                          | 1<br>community controls                                      |
|                            | Definition of Controls( <b>Selection</b> )                                                                                                                                                                                                                                                                                                                                         | 1<br>no history of disease (endpoint)                        |
|                            | Comparability of cases and controls on the basis of the design or analysis( <b>Comparability</b> )                                                                                                                                                                                                                                                                                 | 2<br>study controls for age, gender and other factors.       |
|                            | Ascertainment of exposure( <b>Exposure</b> )                                                                                                                                                                                                                                                                                                                                       | 1<br>secure record                                           |
|                            | Same method of ascertainment for cases and controls( <b>Exposure</b> )                                                                                                                                                                                                                                                                                                             | 1<br>yes                                                     |
|                            | Non-Response rate( <b>Exposure</b> )                                                                                                                                                                                                                                                                                                                                               | 0<br>not described                                           |



Table S2: The risk of bias within individual studies for observational studies by the NOS (continued)

**Luciane et al. 2007**

|                                                                                                    |                                                                                                                                                                                                          |                                                         |
|----------------------------------------------------------------------------------------------------|----------------------------------------------------------------------------------------------------------------------------------------------------------------------------------------------------------|---------------------------------------------------------|
| Study type                                                                                         | Cross-sectional study                                                                                                                                                                                    |                                                         |
| Participants                                                                                       | Subjects: children and adolescents aged 7-17 years<br>N:72 cases, 399 controls<br>Gender: 34 males/38 case, 217 males /182 females control.<br>Location: Brazil                                          |                                                         |
| Comparison                                                                                         | Comparison: patients with overweight vs. control<br>Case: Subjects with overweight<br>Control: normal weight                                                                                             |                                                         |
| Outcomes                                                                                           | Main study outcome: the association between low serum concentrations of carotenoids and overweight (odds ratio)<br>Available outcomes: the risk for the overweight patients of carotenoids insufficiency |                                                         |
| <b><i>Risk of bias</i></b>                                                                         |                                                                                                                                                                                                          |                                                         |
| <b>Bias</b>                                                                                        | <b>Authors' judgment</b>                                                                                                                                                                                 | <b>Support for judgment</b>                             |
| Is the case definition adequate( <b>Selection</b> )                                                | 1                                                                                                                                                                                                        | yes, with independent validation                        |
| Representativeness of the cases( <b>Selection</b> )                                                | 1                                                                                                                                                                                                        | consecutive or obviously representative series of cases |
| Selection of Controls( <b>Selection</b> )                                                          | 1                                                                                                                                                                                                        | community controls                                      |
| Definition of Controls( <b>Selection</b> )                                                         | 1                                                                                                                                                                                                        | no history of disease (endpoint)                        |
| Comparability of cases and controls on the basis of the design or analysis( <b>Comparability</b> ) | 2                                                                                                                                                                                                        | study controls gender and age between case and control. |
| Ascertainment of exposure( <b>Exposure</b> )                                                       | 1                                                                                                                                                                                                        | secure record                                           |
| Same method of ascertainment for cases and controls( <b>Exposure</b> )                             | 1                                                                                                                                                                                                        | yes                                                     |
| Non-Response rate( <b>Exposure</b> )                                                               | 0                                                                                                                                                                                                        | not described                                           |

Table S2: The risk of bias within individual studies for observational studies by the NOS (continued)

[Roseli et al. 2005](#)

|                                                                                                    |                                                                                                                                                                                                                |                                                         |
|----------------------------------------------------------------------------------------------------|----------------------------------------------------------------------------------------------------------------------------------------------------------------------------------------------------------------|---------------------------------------------------------|
| Study type                                                                                         | Case-control study                                                                                                                                                                                             |                                                         |
| Participants                                                                                       | Patients: pre-school children.<br>N:23 cases, 23 controls<br>Gender: 24 males, 22 females<br>Location: Brazil                                                                                                  |                                                         |
| Comparison                                                                                         | Comparison: patients with obesity vs. control<br>Case: pre-school children with obesity<br>Control: pre-school children with normal weight                                                                     |                                                         |
| Outcomes                                                                                           | Main study outcome: Insufficiency (%) and odds ratio (OR, CI 95%) of retinol and carotenoids in obese and non-obese groups<br>Available outcomes: the risk for the obese patients of carotenoids insufficiency |                                                         |
| <b><i>Risk of bias</i></b>                                                                         |                                                                                                                                                                                                                |                                                         |
| <b>Bias</b>                                                                                        | <b>Authors' judgment</b>                                                                                                                                                                                       | <b>Support for judgment</b>                             |
| Is the case definition adequate( <b>Selection</b> )                                                | 1                                                                                                                                                                                                              | yes, with independent validation                        |
| Representativeness of the cases( <b>Selection</b> )                                                | 1                                                                                                                                                                                                              | consecutive or obviously representative series of cases |
| Selection of Controls( <b>Selection</b> )                                                          | 1                                                                                                                                                                                                              | community controls                                      |
| Definition of Controls( <b>Selection</b> )                                                         | 1                                                                                                                                                                                                              | no history of disease (endpoint)                        |
| Comparability of cases and controls on the basis of the design or analysis( <b>Comparability</b> ) | 2                                                                                                                                                                                                              | study controls for age, gender and other factors.       |
| Ascertainment of exposure( <b>Exposure</b> )                                                       | 0                                                                                                                                                                                                              | secure record                                           |
| Same method of ascertainment for cases and controls( <b>Exposure</b> )                             | 1                                                                                                                                                                                                              | yes                                                     |
| Non-Response rate( <b>Exposure</b> )                                                               | 0                                                                                                                                                                                                              | not described                                           |



Table S2: The risk of bias within individual studies for observational studies by the NOS (continued)

Allison et al. 2011

|                            |                                                                                                                                                                                                                                                                                            |                             |                                                         |
|----------------------------|--------------------------------------------------------------------------------------------------------------------------------------------------------------------------------------------------------------------------------------------------------------------------------------------|-----------------------------|---------------------------------------------------------|
| Study type                 | Cross-sectional study                                                                                                                                                                                                                                                                      |                             |                                                         |
| Participants               | Patients: urban Indigenous population<br>Medians age in years (25 <sup>th</sup> -75 <sup>th</sup> %): 35 (22-46) male,37(25-48)female<br>Gender: 280 males 617 females<br>Location: Australia                                                                                              |                             |                                                         |
| Comparison                 | Comparison: patients overweight or obesity vs. control<br>Case: overweight or obese patients<br>Control: normal weight control                                                                                                                                                             |                             |                                                         |
| Outcomes                   | Main study outcome: Odds ratios and 95% confidence intervals from multivariate models looking at factors associated with being in the top 25% for all plasma carotenoid concentrations<br>Available outcomes: the risk for the excess body weight patients in all carotenoids sufficiency. |                             |                                                         |
| <b><i>Risk of bias</i></b> |                                                                                                                                                                                                                                                                                            |                             |                                                         |
|                            | <b>Bias</b>                                                                                                                                                                                                                                                                                | <b>Authors' judgment</b>    |                                                         |
|                            |                                                                                                                                                                                                                                                                                            | <b>Support for judgment</b> |                                                         |
|                            | Is the case definition adequate( <b>Selection</b> )                                                                                                                                                                                                                                        | 1                           | yes, with independent validation                        |
|                            | Representativeness of the cases( <b>Selection</b> )                                                                                                                                                                                                                                        | 1                           | consecutive or obviously representative series of cases |
|                            | Selection of Controls( <b>Selection</b> )                                                                                                                                                                                                                                                  | 1                           | community controls                                      |
|                            | Definition of Controls( <b>Selection</b> )                                                                                                                                                                                                                                                 | 1                           | no history of disease (endpoint)                        |
|                            | Comparability of cases and controls on the basis of the design or analysis( <b>Comparability</b> )                                                                                                                                                                                         | 2                           | study controls for age, gender and other factors.       |
|                            | Ascertainment of exposure( <b>Exposure</b> )                                                                                                                                                                                                                                               | 1                           | secure record                                           |
|                            | Same method of ascertainment for cases and controls( <b>Exposure</b> )                                                                                                                                                                                                                     | 1                           | yes                                                     |
|                            | Non-Response rate( <b>Exposure</b> )                                                                                                                                                                                                                                                       | 0                           | not described                                           |

Table S2: The risk of bias within individual studies for observational studies by the NOS (continued)

[Koji et al. 2003](#)

|              |                                                                                                                                                                                                                                                                                                                                                                                                                                                              |
|--------------|--------------------------------------------------------------------------------------------------------------------------------------------------------------------------------------------------------------------------------------------------------------------------------------------------------------------------------------------------------------------------------------------------------------------------------------------------------------|
| Study type   | Cross-sectional study                                                                                                                                                                                                                                                                                                                                                                                                                                        |
| Participants | <p>Patients undergoing health examination</p> <p>Male group</p> <p>N:50 cases, 108 controls</p> <p>Mean age in years (SD): 58.3 (10.4) case, 59.3 (10.8) control.</p> <p>Gender: 50 males/0 females case, 108 males /0 females control.</p> <p>Female</p> <p>N:52 cases, 106 controls</p> <p>Mean age in years (SD): 59.4 (10.2) case, 58.7 (10.8) control.</p> <p>Gender: 0 males/52 females case, 0 males /106 females control.</p> <p>Location: Japan</p> |
| Comparison   | <p>Comparison: patients with obese vs. control</p> <p>Case: obese patients</p> <p>Control: normal control</p>                                                                                                                                                                                                                                                                                                                                                |
| Outcomes     | <p>Main study outcome: Odds ratios and 95% confidence intervals for elevated levels of serum CRP, carotenoids, leptin, oxidized LDL, and oxidized LDL antibodies.</p> <p>Available outcomes: the risk for the obese patients of carotenoids insufficiency.</p>                                                                                                                                                                                               |

***Risk of bias***

| Bias                                                                                               | Authors' judgment | Support for judgment                                    |
|----------------------------------------------------------------------------------------------------|-------------------|---------------------------------------------------------|
| Is the case definition adequate( <b>Selection</b> )                                                | 1                 | yes, with independent validation                        |
| Representativeness of the cases( <b>Selection</b> )                                                | 1                 | consecutive or obviously representative series of cases |
| Selection of Controls( <b>Selection</b> )                                                          | 0                 | hospital controls                                       |
| Definition of Controls( <b>Selection</b> )                                                         | 1                 | no history of disease (endpoint)                        |
| Comparability of cases and controls on the basis of the design or analysis( <b>Comparability</b> ) | 2                 | study controls for age, gender and other factors.       |
| Ascertainment of exposure( <b>Exposure</b> )                                                       | 1                 | secure record                                           |
| Same method of ascertainment for cases and controls( <b>Exposure</b> )                             | 1                 | yes                                                     |
| Non-Response rate( <b>Exposure</b> )                                                               | 0                 | Not mentioned                                           |

Table S2: The risk of bias within individual studies for observational studies by the NOS (continued)

Joel E. et al. 2006

| Study type                                                                                         | Cross-sectional study                                                                                                                                                                                                                                                                                                                                                                                                                                                                                                                                                                                                                                                                                                                                                                                                                                                                                                                                                             |                                                         |
|----------------------------------------------------------------------------------------------------|-----------------------------------------------------------------------------------------------------------------------------------------------------------------------------------------------------------------------------------------------------------------------------------------------------------------------------------------------------------------------------------------------------------------------------------------------------------------------------------------------------------------------------------------------------------------------------------------------------------------------------------------------------------------------------------------------------------------------------------------------------------------------------------------------------------------------------------------------------------------------------------------------------------------------------------------------------------------------------------|---------------------------------------------------------|
| Participants                                                                                       | <p>Patients: American adults</p> <p>Premenopausal women group</p> <p>N:1320 cases(obese), 1212 cases (overweight),1980 controls</p> <p>Gender: 0 males/1320 females case(obese),0 males/1212females case(overweight), 0 males /1980 females control.</p> <p>Postmenopausal women group</p> <p>N:1267 cases(obese), 1365 cases (overweight), 1239 controls</p> <p>Gender: 0 males/1267 females case(obese),0 males/1365females case(overweight), 0 males /1239 females control.</p> <p>Young male group(19 - &lt; 65 years)</p> <p>N:2285 cases(obese), 1244 cases (overweight),2346 controls</p> <p>Gender: 2285 males/0 females case(obese),1244 males/0females case(overweight), 2346 males /0 females control</p> <p>Old male group(<math>\geq 65</math> years)</p> <p>N:363 cases(obese), 854 cases (overweight), 716 controls</p> <p>Gender: 363males/0females case(obese), 854 males/0 females case (overweight), 716males /0 females control</p> <p>Location: the U.S.</p> |                                                         |
| Comparison                                                                                         | <p>Comparison: patients with obese or overweight vs. control</p> <p>Case: obese or overweight patients</p> <p>Control: normal weight control</p>                                                                                                                                                                                                                                                                                                                                                                                                                                                                                                                                                                                                                                                                                                                                                                                                                                  |                                                         |
| Outcomes                                                                                           | <p>Main study outcome: Odd ratios of low micronutrient levels among US men and women</p> <p>Available outcomes: the risk for the obese or overweight patients of carotenoids insufficiency.</p>                                                                                                                                                                                                                                                                                                                                                                                                                                                                                                                                                                                                                                                                                                                                                                                   |                                                         |
| <b><i>Risk of bias</i></b>                                                                         |                                                                                                                                                                                                                                                                                                                                                                                                                                                                                                                                                                                                                                                                                                                                                                                                                                                                                                                                                                                   |                                                         |
| Bias                                                                                               | Authors' judgment                                                                                                                                                                                                                                                                                                                                                                                                                                                                                                                                                                                                                                                                                                                                                                                                                                                                                                                                                                 | Support for judgment                                    |
| Is the case definition adequate( <b>Selection</b> )                                                | 1                                                                                                                                                                                                                                                                                                                                                                                                                                                                                                                                                                                                                                                                                                                                                                                                                                                                                                                                                                                 | yes, with independent validation                        |
| Representativeness of the cases( <b>Selection</b> )                                                | 1                                                                                                                                                                                                                                                                                                                                                                                                                                                                                                                                                                                                                                                                                                                                                                                                                                                                                                                                                                                 | consecutive or obviously representative series of cases |
| Selection of Controls( <b>Selection</b> )                                                          | 1                                                                                                                                                                                                                                                                                                                                                                                                                                                                                                                                                                                                                                                                                                                                                                                                                                                                                                                                                                                 | community controls                                      |
| Definition of Controls( <b>Selection</b> )                                                         | 1                                                                                                                                                                                                                                                                                                                                                                                                                                                                                                                                                                                                                                                                                                                                                                                                                                                                                                                                                                                 | no history of disease (endpoint)                        |
| Comparability of cases and controls on the basis of the design or analysis( <b>Comparability</b> ) | 2                                                                                                                                                                                                                                                                                                                                                                                                                                                                                                                                                                                                                                                                                                                                                                                                                                                                                                                                                                                 | study controls for age, gender and other factors.       |
| Ascertainment of exposure( <b>Exposure</b> )                                                       | 0                                                                                                                                                                                                                                                                                                                                                                                                                                                                                                                                                                                                                                                                                                                                                                                                                                                                                                                                                                                 | self-reported                                           |

|                                                                        |   |              |
|------------------------------------------------------------------------|---|--------------|
| Same method of ascertainment for cases and controls( <b>Exposure</b> ) | 1 | yes          |
| Non-Response rate( <b>Exposure</b> )                                   | 0 | Not mentiond |

Table S3. The Summary of Findings (SoF) with GRADE system

| <b>The risk of insufficient of carotenoids excess bodyweight compared with normal bodyweight in risk of insufficient of carotenoids</b>                                                                                                          |                          |                                |                                             |
|--------------------------------------------------------------------------------------------------------------------------------------------------------------------------------------------------------------------------------------------------|--------------------------|--------------------------------|---------------------------------------------|
| <b>Population:</b> subjects with overweight or obese vs. normal subjects                                                                                                                                                                         |                          |                                |                                             |
| <b>Settings:</b> Two studies (twenty-two data) were conducted in Asia; three studies (four data) were conducted in South America; two studies (forty-four data) were conducted in North America; one study (two data) were conducted in Oceania. |                          |                                |                                             |
| <b>Cases:</b> subjects with overweight or obese                                                                                                                                                                                                  |                          |                                |                                             |
| <b>Controls:</b> normal subjects                                                                                                                                                                                                                 |                          |                                |                                             |
| Outcomes                                                                                                                                                                                                                                         | OR (95% CI) <sup>1</sup> | No. of participants(studies)   | Quality of the evidence<br>Comments (GRADE) |
| The risk of insufficient of carotenoids.                                                                                                                                                                                                         | 1.731(1.565,1.913)       | 28446(8 observational studies) | ⊕ ⊕ ⊕ ⊖ Moderate <sup>2</sup>               |
| Abbreviations: OR: odd ratio; CI: Confidence interval;                                                                                                                                                                                           |                          |                                |                                             |
| <b>GRADE Working Group grades of evidence</b>                                                                                                                                                                                                    |                          |                                |                                             |
| <b>High quality:</b> We are very confident that the true effect lies close to that of the estimate of the effect                                                                                                                                 |                          |                                |                                             |
| <b>Moderate quality:</b> We are moderately confident in the effect estimate: The true effect is likely to be close to the estimate of the effect, but there is a possibility that it is substantially different                                  |                          |                                |                                             |
| <b>Low quality:</b> Our confidence in the effect estimate is limited: The true effect may be substantially different from the estimate of the effect                                                                                             |                          |                                |                                             |
| <b>Very low quality:</b> We have very little confidence in the effect estimate: The true effect is likely to be substantially different from the estimate of effect                                                                              |                          |                                |                                             |
| <sup>1</sup> Results for the risk of insufficient of carotenoids for the subjects with overweight or obese compared with the subjects with normal weight.                                                                                        |                          |                                |                                             |
| <sup>2</sup> Upgraded by one level due to all the results of the included studies were almost identical (subjects with overweight or obesity had lower serum carotenoid levels).                                                                 |                          |                                |                                             |



Table S4 Subgroup analyses for the overweight or obesity in carotenoid supplementation groups and control groups

| Factors                | Numbers of studies |     |    |    |
|------------------------|--------------------|-----|----|----|
|                        | BW                 | BMI | WC | TG |
| <b>Intervention</b>    |                    |     |    |    |
| <b>time</b>            |                    |     |    |    |
| >12weeks               | 2                  | 1   | 2  | 2  |
| ≤12weeks               | 6                  | 5   | 4  | 3  |
| <b>Region</b>          |                    |     |    |    |
| Europe                 | 2                  | 0   | 2  | 2  |
| Asia                   | 6                  | 6   | 4  | 3  |
| <b>Population type</b> |                    |     |    |    |
| overweight             | 3                  | 3   | 2  | 1  |
| obesity                | 2                  | -   | 2  | 3  |
| overweight & obesity   | 3                  | 3   | 2  | 1  |
| <b>Population</b>      |                    |     |    |    |
| <b>Gender</b>          |                    |     |    |    |
| F                      | 3                  | 1   | 2  | 2  |
| M                      | 2                  | 2   | 1  | -  |
| F&M                    | 2                  | 2   | 2  | 3  |

**BW**, body weight; **BMI**, body mass index; **WC**, waist circumference; **TG**, Triglyceride; **F**, Female; **M**, Male; **F&M**, Female and male.

Table S4 Subgroup analyses for the overweight or obesity in carotenoid supplementation groups and control groups(continued)

| Factors                  | Standard mean difference(95%CI),P |                                |                             |                                |
|--------------------------|-----------------------------------|--------------------------------|-----------------------------|--------------------------------|
|                          | BW                                | BMI                            | WC                          | TG                             |
| <b>Intervention time</b> |                                   |                                |                             |                                |
| >12weeks                 | -8.428(-16.645, -0.211), 0.044    | -                              | -3.559(-7.918,0.799),0.109  | -5.846(-6.625, -5.068), <0.001 |
| ≤12weeks                 | -0.631(-1.613, 0.350), 0.207      | -                              | -1.033(-2.314,0.247),0.114  | 0.607(-1.660, 2.873),0.600     |
| <b>Region</b>            |                                   |                                |                             |                                |
| Europe                   | -8.428(-16.645, -0.211), 0.044    | -                              | -3.559(-7.918,0.799), 0.109 | -5.846(-6.625, -5.068), <0.001 |
| Asia                     | -0.631(-0.631,0.350), 0.207       | -                              | -1.033(-2.314,0.247),0.114  | 0.607(-1.660, 2.873), 0.600    |
| <b>Population weight</b> |                                   |                                |                             |                                |
| overweight               | -1.158(-3.226,0.910),0.272        | -1.659(-3.455,0.137),0.07      | -1.626(-4.297,1.046), 0.233 | -                              |
| obese                    | -8.428(-16.645, -0.211), 0.044    | -                              | -3.559(-7.918,0.799),0.109  | -                              |
| Overweight & obese       | -0.055(-0.621,0.511),0.849        | -0.176(-0.607,0.254),0.422     | -0.400(-1.182,0.381),0.316  | -                              |
| <b>Population Gender</b> |                                   |                                |                             |                                |
| F                        | -5.416(-10.680, -0.153), 0.044    | -                              | -3.559(-7.918,0.799),0.109  | -5.846(-6.625, -5.068),<0.001  |
| M                        | -0.087(-0.455, 0.281),0.642       | -0.701(-1.081, -0.322), <0.001 | -                           |                                |
| F&M                      | -2.005(-4.534,0.524),0.120        | -2.133(-4.747,0.481),0.110     | -1.937(-4.045,0.171),0.072  | 0.607(-1.660,2.873),0.600      |

**BW**, body weight; **BMI**, body mass index; **WC**, waist circumference; **TG**, Triglyceride; **F**, Female; **M**, Male; **F&M**, Female and male.

Table S4 Subgroup analyses for the overweight or obesity in carotenoid supplementation groups and control groups(continued)

| Factors               | Heterogeneity I <sup>2</sup> (%), <i>P</i> |              |              |              |
|-----------------------|--------------------------------------------|--------------|--------------|--------------|
|                       | BW                                         | BMI          | WC           | TG           |
| <b>Intervention</b>   |                                            |              |              |              |
| <b>time</b>           |                                            |              |              |              |
| >12                   | 98.0, <0.001                               | -            | 98.2, <0.001 | 4.6, 0.306   |
| ≤12                   | 94.1, <0.001                               | -            | 94.8, <0.001 | 94.4, <0.001 |
| <b>Region</b>         |                                            |              |              |              |
| Europe                | 98.0, <0.001                               | -            | 98.2, <0.001 | 4.6,0.306    |
| Asia                  | 94.1, <0.001                               | -            | 94.8, <0.001 | 94.4, <0.001 |
| <b>Population</b>     |                                            |              |              |              |
| <b>weight</b>         |                                            |              |              |              |
| overweight            | 97.0, <0.001                               | 95.7, <0.001 | 98.0, <0.001 | -            |
| obese                 | 98.0, <0.001                               | -            | 98.2, <0.001 | -            |
| overweight &<br>obese | 63.5, <0.065                               | 38.3,0.198   | 61.3,0.108   | -            |
| <b>Population</b>     |                                            |              |              |              |
| <b>Gender</b>         |                                            |              |              |              |
| F                     | 99.0, <0.001                               | -            | 98.2, <0.001 | 4.6,0.306    |
| M                     | 0.0,0.948                                  | 96.0, <0.001 | -            | -            |
| F&M                   | 95.8, <0.001                               | 0.0, 0.677   | 94.2, <0.001 | 94.4, <0.001 |

**BW**, body weight; **BMI**, body mass index; **WC**, waist circumference; **TG**, Triglyceride; **F**, Female; **M**, Male; **F&M**, Female and male.

Table S5 Publication bias (Egger test) and sensitivity analysis (trim and fill method) performed for included studies (RCTs)

|                           | Egger test( <i>t</i> , <i>P</i> ) | Number of trim and fill | SMD (95%CI), <i>P</i> <sup>a</sup> | SMD (95%CI), <i>P</i> <sup>b</sup> |
|---------------------------|-----------------------------------|-------------------------|------------------------------------|------------------------------------|
| Body weight(kg)           | -3.26,0.017                       | 2                       | -2.336(-3.801, -0.871),0.002       | -3.357(-5.461,-1.254),0.002        |
| BMI(kg m <sup>-2</sup> )  | -0.98,0.383                       | -                       | -0.948(-1.883, -0.014),0.047       | -                                  |
| WC(cm)                    | -2.17,0.096                       | -                       | -1.839(-3.138, -0.539),0.006       | -                                  |
| HDL(mg dL <sup>-1</sup> ) | -                                 | -                       | 0.757(0.101,1.413),0.465           | -                                  |
| LDL(mg dL <sup>-1</sup> ) | -19.68,0.032                      | 0                       | -1.300(-3.225,0.625),0.186         | -1.300(-3.225,.625),0.186          |
| TC(mg dL <sup>-1</sup> )  | -                                 | -                       | -2.095(-3.201,-0.989),<0.001       | -                                  |
| TG(mg dL <sup>-1</sup> )  | -0.08,0.943                       | -                       | -1.875(-4.382,0.632), 0.143        | -                                  |

<sup>a</sup> Original variation. <sup>b</sup> Variation after trim and fill.

**SMD**: Standard mean difference; **BMI**, body mass index; **WC**, waist circumference; **HDL**, high-density lipoprotein; **LDL**, Low Density Lipoprotein; **TC**, Total cholesterol; **TG**, Triglyceride.

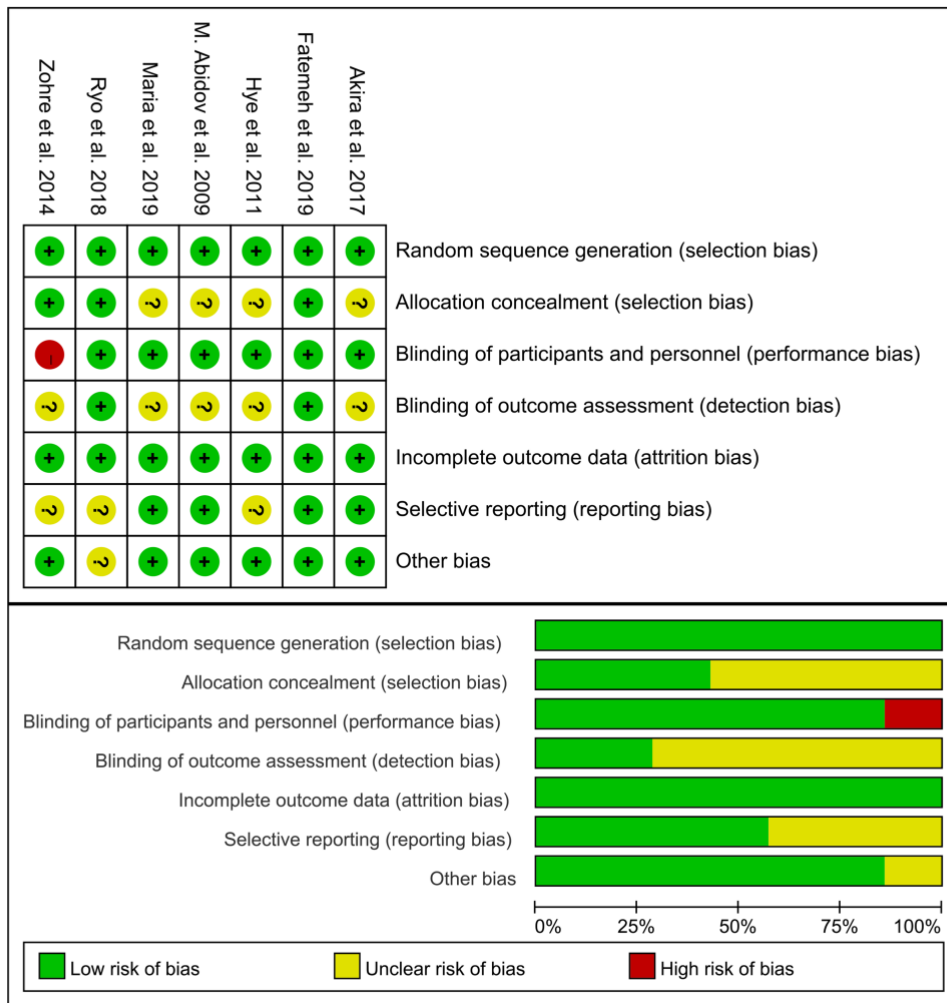

Figure S1: Risk of within-study bias (RCT)
